# Supplementary material
Source: Springer Nature journal article supplement (https://www.springermedizin.de/resource/supplementary/13098_2011_171_MOESM4_ESM.pdf/9670626)

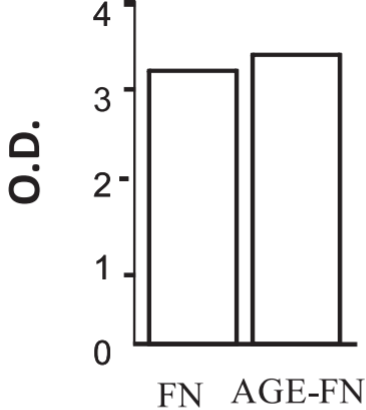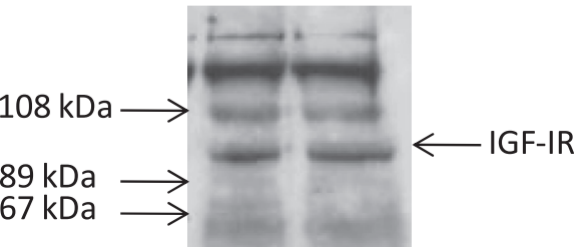

Supplement: MOESM4 [file 9670626]
